# Supplementary material
Source: Springer Nature journal article supplement (https://www.springermedizin.de/resource/supplementary/12990_2014_662_MOESM3_ESM.pdf/9612330)

# Spontaneous EPSCs

**A**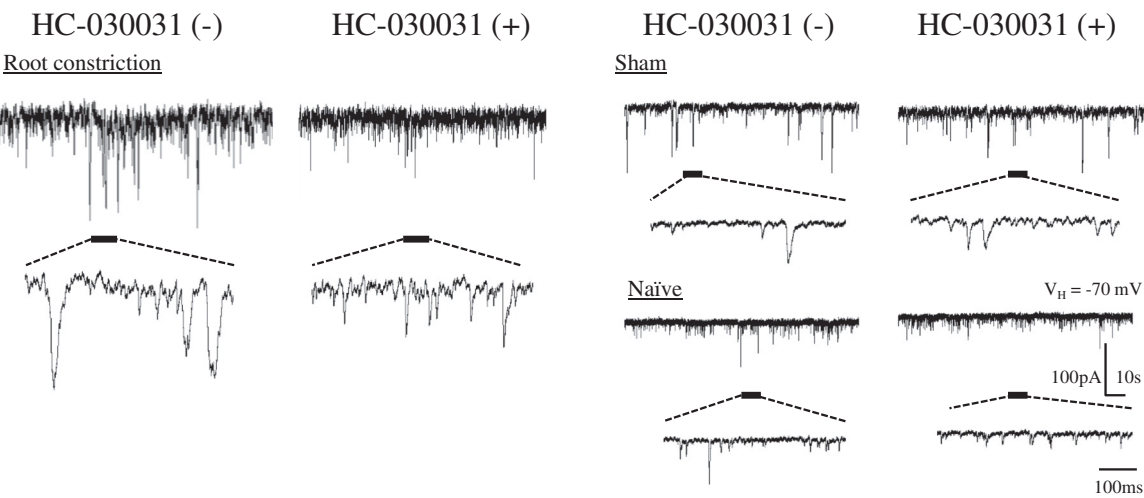**B**

## Air-evoked EPSCs

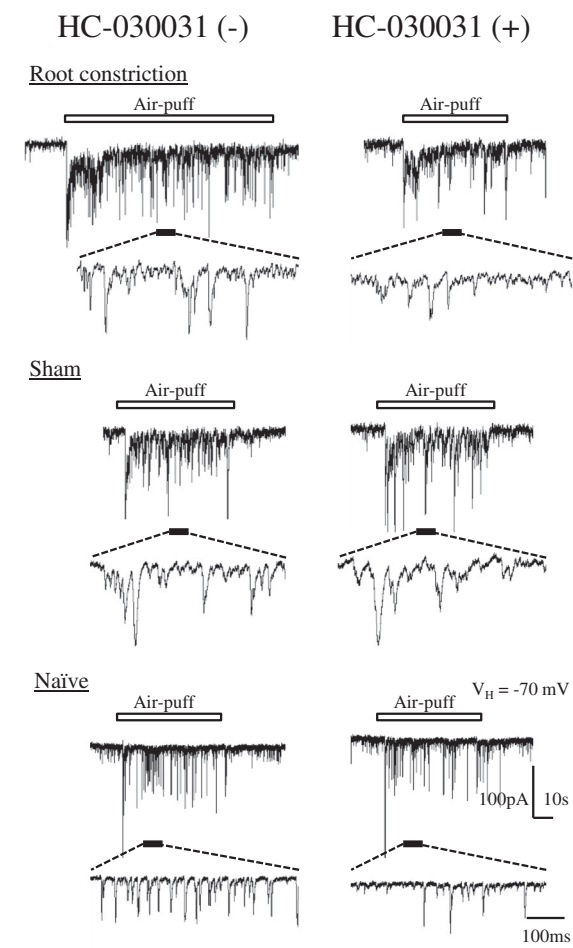**C**

## Pinch-evoked EPSCs

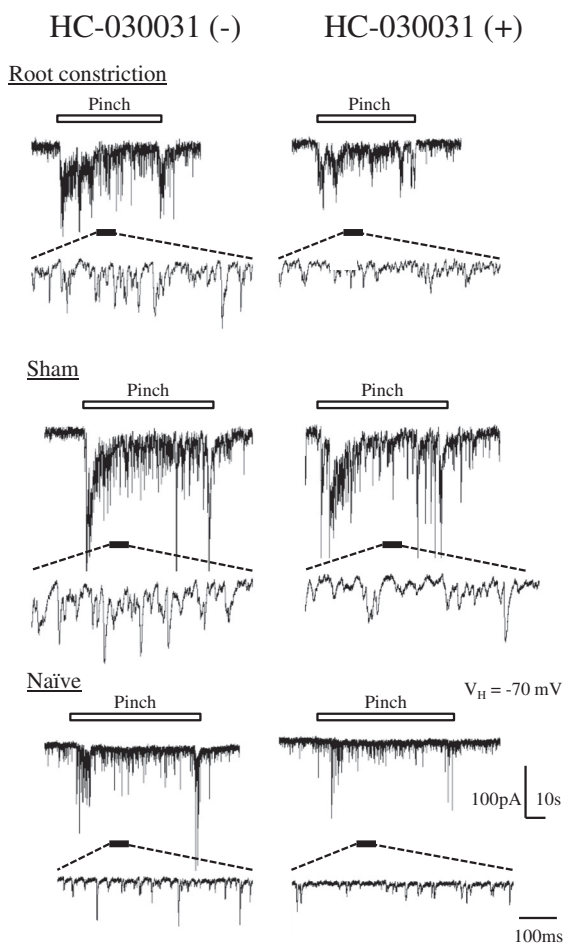

Supplement: MOESM3 [file 9612330]
